# Supplementary material for: Omics Approaches in Adipose Tissue and Skeletal Muscle Addressing the Role of Extracellular Matrix in Obesity and Metabolic Dysfunction
Source: Int J Mol Sci. 2021 Mar 9;22(5):2756. doi: 10.3390/ijms22052756 (PMC7963192; doi:10.3390/ijms22052756)
Supplement: Supplementary file 1 [file ijms-22-02756-s001.pdf]

Figure S1. Study selection according to PRISMA 2009 Flow Diagram.

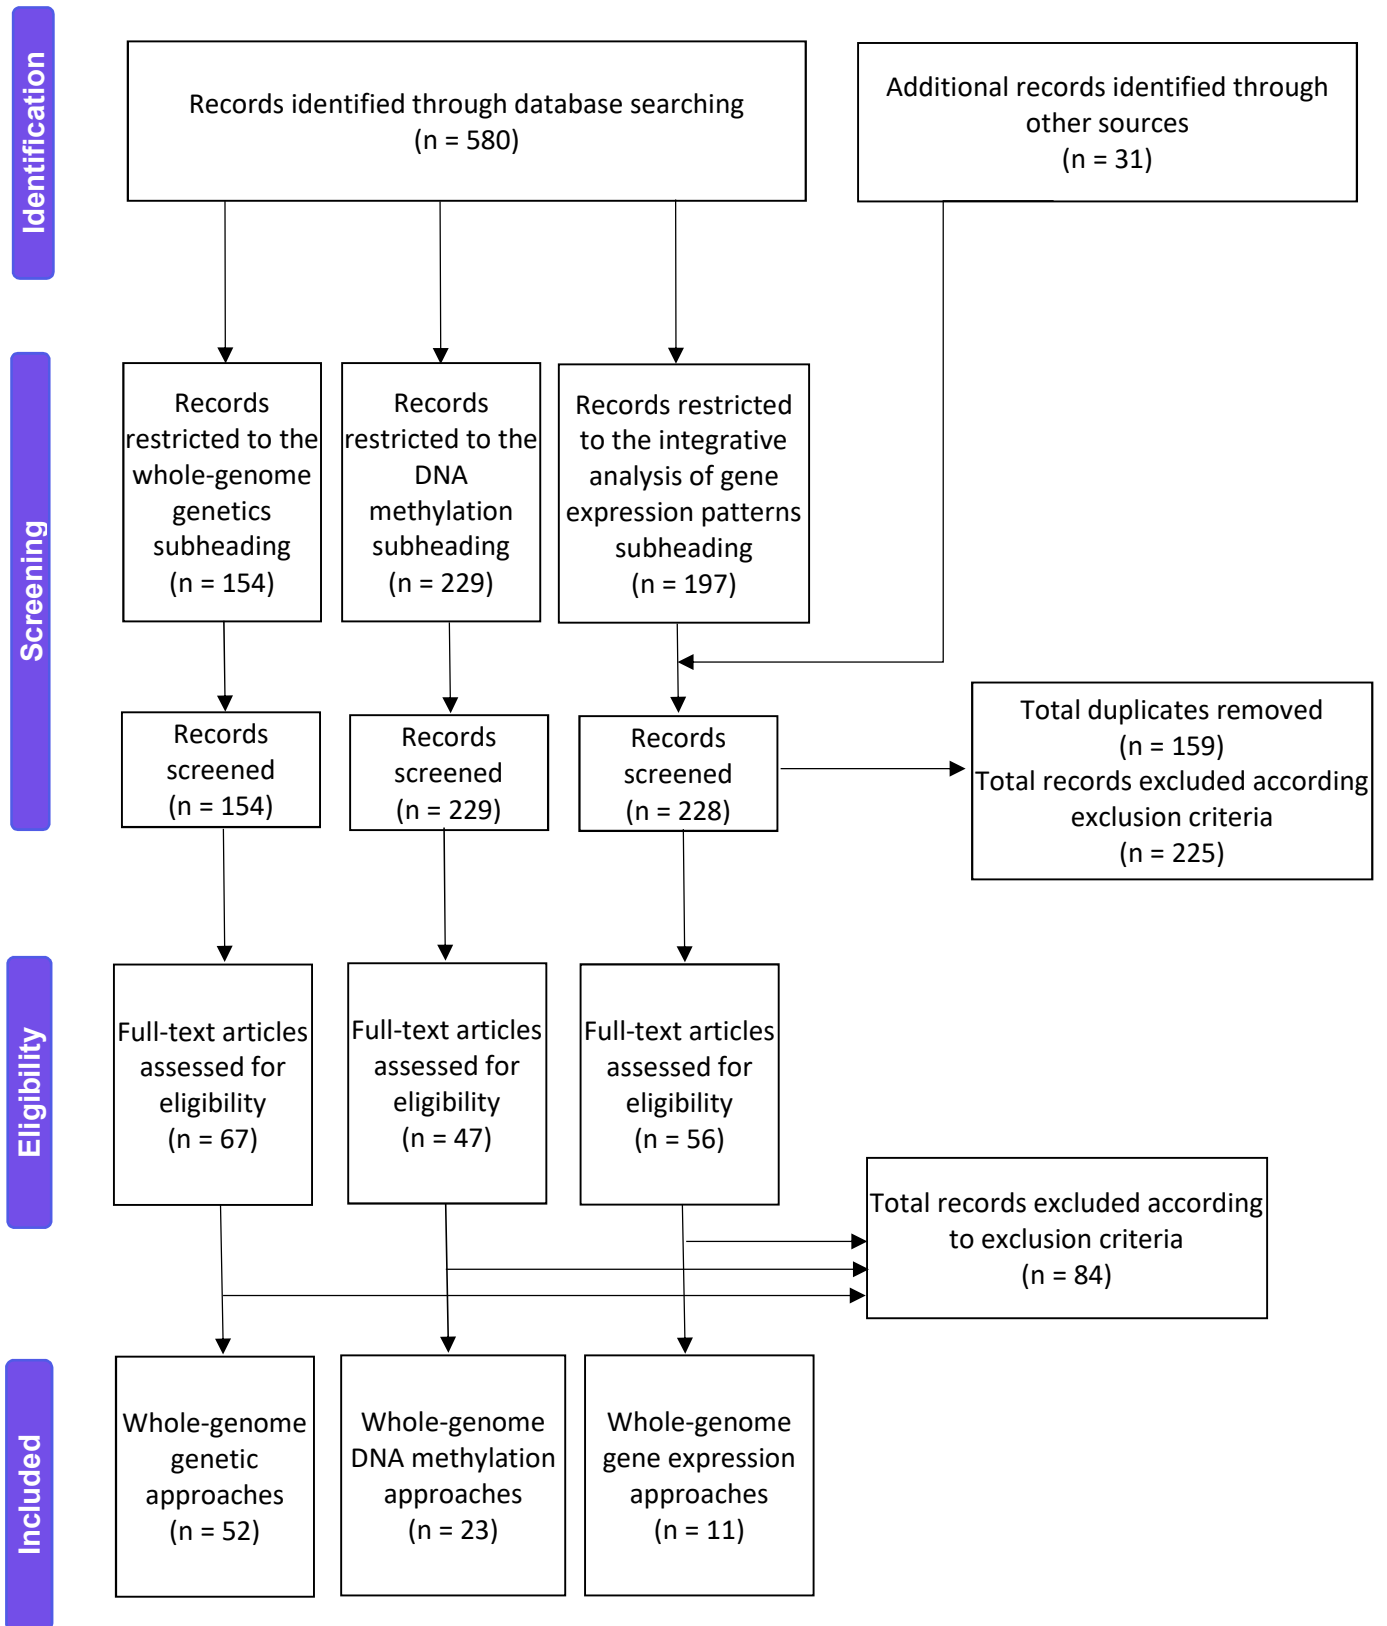

**Table S1. Ontology terms selected for the search and number of genes annotated in each term**

| Term Type  | Term description                                                | N° of annotated genes |
|------------|-----------------------------------------------------------------|-----------------------|
| GO TERMS   | Cell adhesion molecule binding                                  | 541                   |
|            | Regulation of cell adhesion                                     | 431                   |
|            | Collagen containing extracellular matrix                        | 351                   |
|            | Cell matrix adhesion                                            | 159                   |
|            | Extracellular matrix organization                               | 88                    |
|            | Positive regulation of endothelial cell migration               | 85                    |
|            | Negative regulation of endothelial cell migration               | 74                    |
|            | Extracellular matrix                                            | 66                    |
|            | Extracellular matrix disassembly                                | 34                    |
|            | Extracellular matrix assembly                                   | 18                    |
|            | Extracellular matrix structural constituent                     | 18                    |
|            | Extracellular matrix disassembly                                | 15                    |
|            | Costamere                                                       | 12                    |
|            | Matrix metalloproteinase secretion                              | 9                     |
|            | Extracellular matrix constituent secretion                      | 8                     |
|            | Dystrophin associated glycoprotein complex                      | 7                     |
|            | Substrate dependent cell migration                              | 7                     |
|            | Cell matrix adhesion                                            | 6                     |
|            | Cell adhesion involved in heart morphogenesis                   | 5                     |
|            | Dystroglycan complex                                            | 5                     |
|            | Extracellular matrix binding                                    | 5                     |
|            | Extracellular matrix binding                                    | 5                     |
|            | Regulation of endothelial cell migration                        | 5                     |
|            | Extracellular matrix cell signaling                             | 3                     |
|            | Extracellular matrix organization                               | 3                     |
|            | Cell adhesion involved in sprouting angiogenesis                | 2                     |
|            | Extracellular matrix protein binding                            | 2                     |
|            | Transforming growth factor beta activation                      | 2                     |
|            | Integrin complex                                                | 1                     |
|            | Positive regulation of collagen catabolic process               | 1                     |
|            | Regulation of cell migration involved in sprouting Angiogenesis | 1                     |
| KEGG terms | Regulation of actin cytoskeleton                                | 84                    |
|            | Focal adhesion                                                  | 64                    |
|            | Tight junction                                                  | 38                    |
|            | Adherents junction                                              | 23                    |
|            | ECM-receptor interaction                                        | 8                     |

**Abbreviations:** GO, Gene Ontology; KEGG, Kyoto Encyclopaedia of Genes and Genomes; ECM, extracellular matrix

Table S2. Boolean search equations employed.

| Approaches                   | Search syntax                                                                                                                                                                                                                                                                          |
|------------------------------|----------------------------------------------------------------------------------------------------------------------------------------------------------------------------------------------------------------------------------------------------------------------------------------|
| Whole-genome genetics        | <i>(GENE_SYMBOL<sub>(i)</sub>[Title/Abstract]) OR (GENE_SYMBOL<sub>(i)</sub>[MeSH Terms]) AND (human? OR children OR teenage? OR adolescent OR adult?) AND (obesity[Title/Abstract]) AND (SNPs*) AND ((GWAS[Title/Abstract]) OR (genome wide association[Title/Abstract]))</i>         |
| Whole-genome DNA Methylation | <i>(GENE_SYMBOL<sub>(i)</sub>[Title/Abstract]) OR (GENE_SYMBOL<sub>(i)</sub>[MeSH Terms]) AND (human? OR children OR teenage? OR adolescent OR adult?) AND (obesity) AND (*methylation*) AND ((adipose*[Title/Abstract]) OR (blood[Title/Abstract]) OR (*muscle*[Title/Abstract]))</i> |
| Whole-genome gene expression | <i>(GENE_SYMBOL<sub>(i)</sub>[Title/Abstract]) OR (GENE_SYMBOL<sub>(i)</sub>[MeSH Terms]) AND (humans) AND (obesity) AND (gene expression) AND ((extracellular matrix[MeSH Terms]) OR (extracellular matrix proteins[MeSH Terms])) AND ((adipose tissue) OR (muscle, skeletal))</i>    |

The database consulted was NCBI/PudMed. The iterative search was performed by replacing *GENE\_SYMBOL(i)* for the corresponding *i*th gene from the 2186 selected genes list.
